# Supplementary material
Source: publisher figshare collection journal article supplement (https://acs.figshare.com/ndownloader/files/3815704)
Supplement: Supplementary file 1 [file 3815704]

## *Supporting Information*

# **Micromechanical Behavior of Polycrystalline Metal-Organic Framework Thin Films Synthesized by Electrochemical Reaction**

*Imogen Buchan, Matthew R. Ryder and Jin-Chong Tan\**

Department of Engineering Science, Parks Road OX1 3PJ,

University of Oxford, United Kingdom.

\*jin-chong.tan@eng.ox.ac.uk

## Experimental setup for electrochemical synthesis and processing parameters

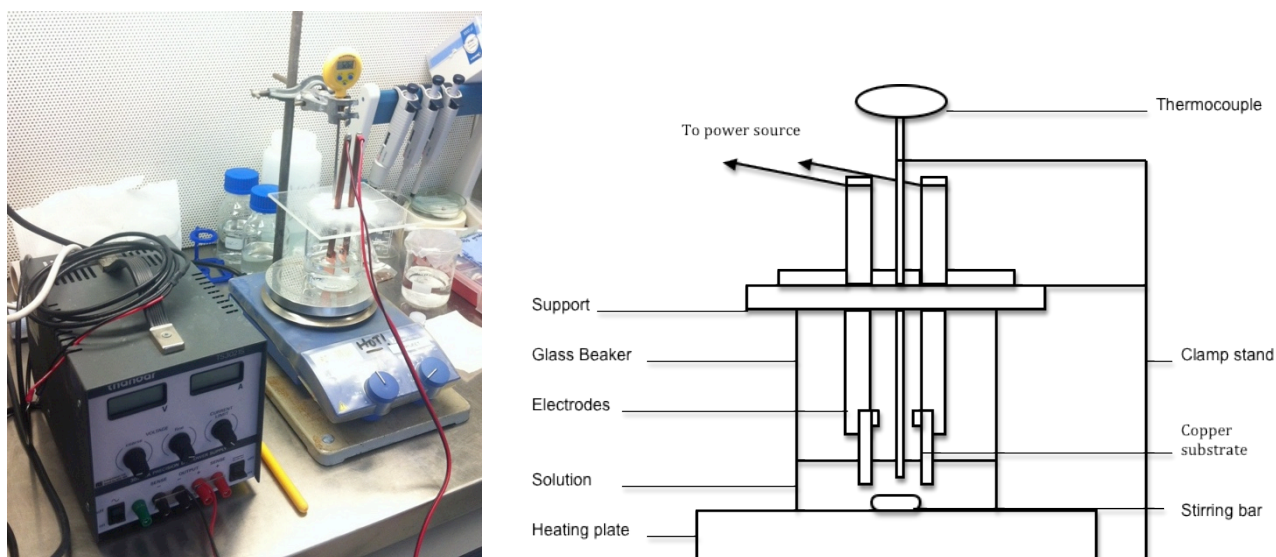

**Figure S1.** Electrochemical reaction set-up used in this study. The front of the substrates were arranged as the inside faces, facing each other at 1 cm separation. These substrates are screwed to the base of two copper electrodes, which are held in place by a support, designed to hold the substrates at the correct position within 100 mL of solution in a 250 mL beaker placed on a heated stirrer plate. The support also allowed a thermocouple to be placed into the solution, to monitor the temperature throughout the reaction. The electrodes were connected to a DC power supply.

| Sample No.                 | 8    | 11   | 12   | 13   | 14   | 15   | 16   | 17   | 18   | 19   | 20   | 21   | 22   | 25   | 26   |
|----------------------------|------|------|------|------|------|------|------|------|------|------|------|------|------|------|------|
| Substrate Grinding (grit)  | 600  | 4000 | 2000 | 4000 | 4000 | 4000 | 2000 | 2000 | 2000 | 2000 | 4000 | 4000 | 2000 | 4000 | 2000 |
| Substrate Polish (microns) | -    | 1    | 1    | -    | -    | -    | -    | -    | -    | -    | 1    | 6    | -    | 1    | -    |
| Average Temperature (C)    | 56.2 | 56.4 | 49.0 | 52.6 | 55.5 | 55.8 | 53.3 | 54.6 | 65.0 | 58   | 59.9 | 55.5 | 59.8 | 57.3 | 56.6 |
| Reaction Time (s)          | 180  | 180  | 180  | 180  | 180  | 180  | 300  | 240  | 600  | 90   | 180  | 180  | 420  | 600  | 240  |

**Table S1.** Sample preparation parameters. All reaction solutions consisted of 56 mL ethanol, 44 mL water, 1 g 1,3,5-benzenetricarboxylic acid (BTC) and 2 g MTBS. A DC waveform at 2.5 V was used for all reactions. Samples no. 19, 12, 18, 25 respectively correspond to coatings “A”, “B”, “C”, “D” reported in the manuscript.

| HKUST-1<br>coating | Film thickness estimated from SEM images<br>(nm) |       |       |      |      |       |       |       |      |      |
|--------------------|--------------------------------------------------|-------|-------|------|------|-------|-------|-------|------|------|
|                    |                                                  |       |       |      |      |       |       |       |      |      |
| A                  | 3013                                             | 1185  | 2667  | 2716 | 1334 | 1087  | 3013  | 3655  | 3358 | 1235 |
| B                  | 7340                                             | 3378  | 5301  | 4485 | 2854 | 2988  | 2338  | 3897  | 2209 | 2209 |
| C                  | 13800                                            | 11260 | 12600 | 8175 | 7103 | 12200 | 11660 | 8845  | 4513 | 8577 |
| D                  | 14660                                            | 5498  | 11000 | 9896 | 4765 | 10269 | 11730 | 12460 | 6964 | 9896 |

**Table S2.** Values used to calculate the mean film thickness via SEM for coatings A, B, C and D, in which 10 random sampling areas were obtained for each coating.

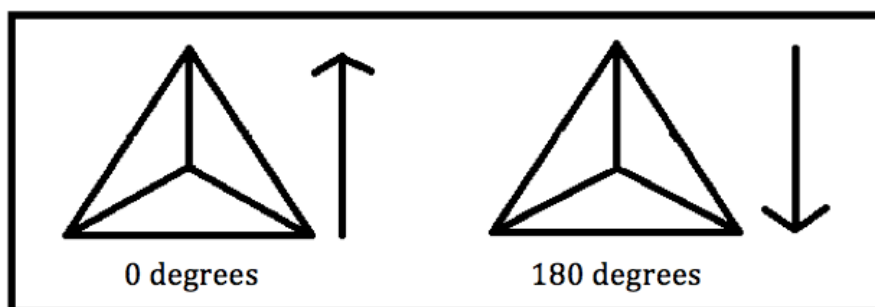

**Figure S2.** The movement of the Berkovich indenter tip in nanoscratch experiments designated as  $0^\circ$  and  $180^\circ$  orientations, respectively.

### X-Ray diffraction (XRD) of HKUST-1 thin film coatings of different thicknesses

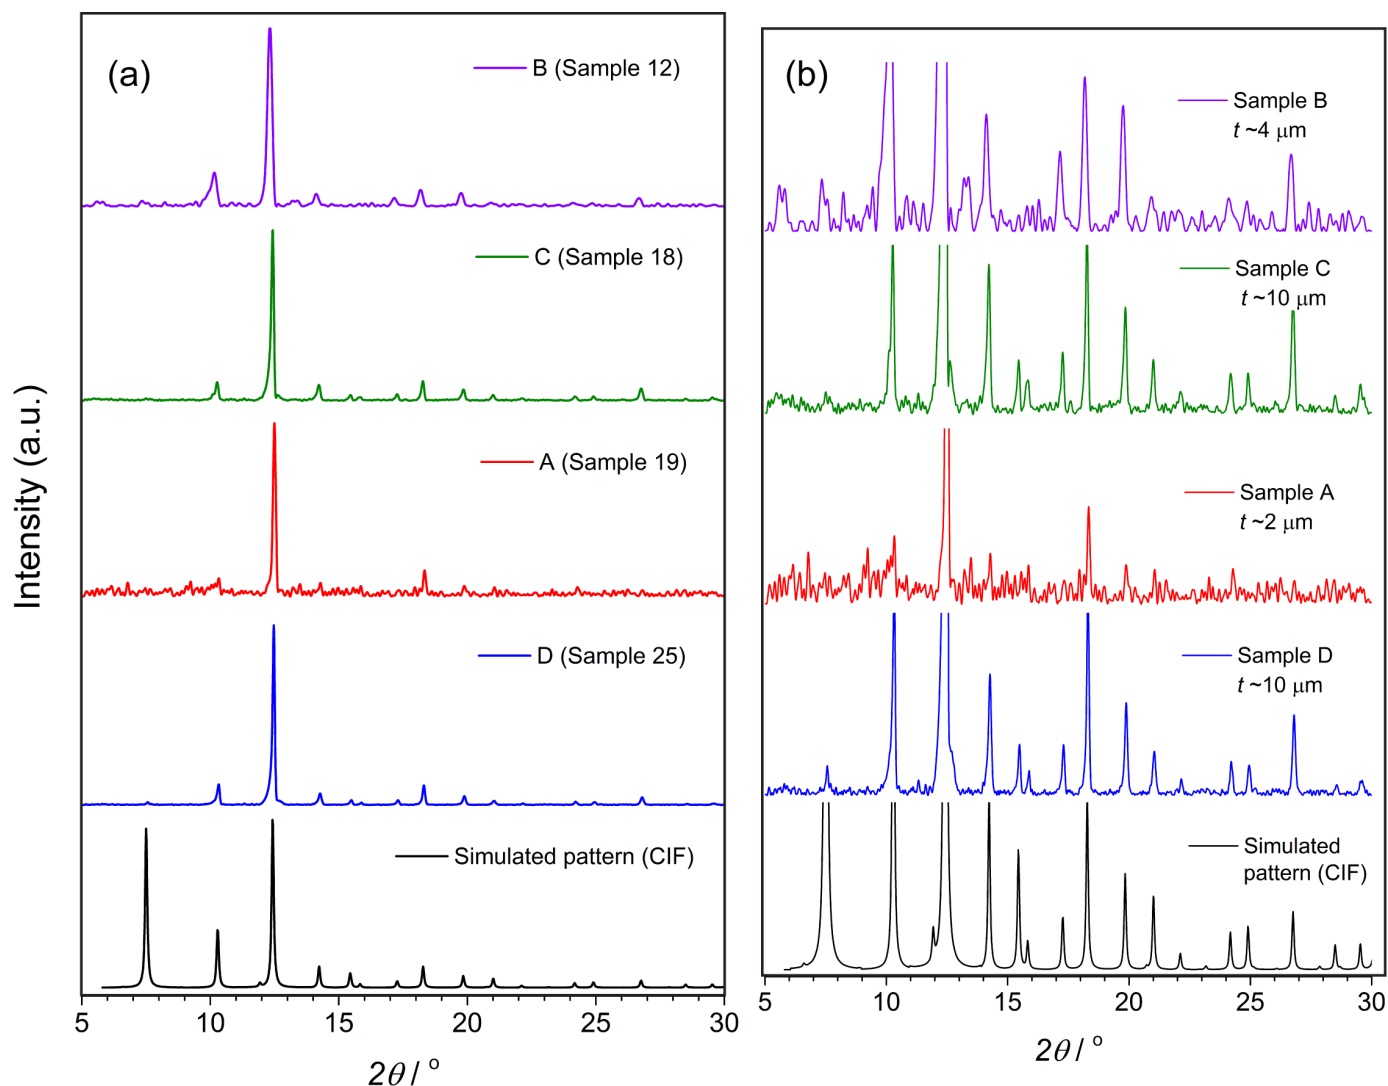

**Figure S3.** The XRD patterns of the HKUST-1 thin-film coatings for  $2\theta$  up to  $30^\circ$ . The diffraction data are consistent with published crystallographic structure (CIF: FIQCEN)<sup>1</sup>, confirming the coatings to be HKUST-1 [ $\text{Cu}_2(\text{BTC})_3$ ]. As expected thinner films have relatively lower intensities than their thicker counterparts. Panel (b) is used to better highlight the relatively low intensity regions in panel (a).

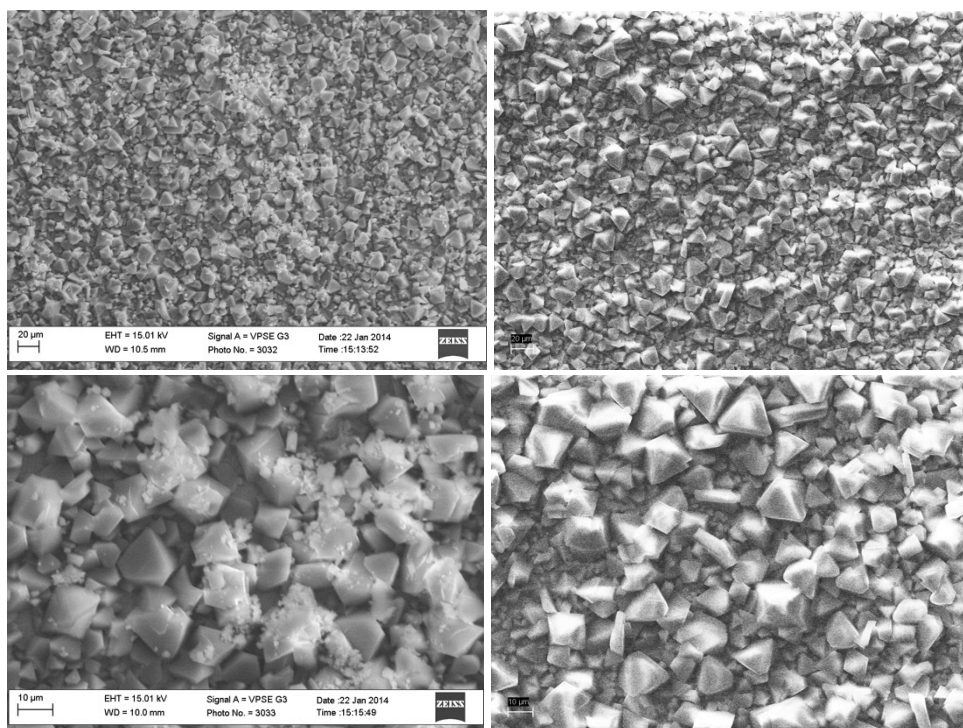

**Figure S4.** Effect of substrate polishing on the morphology of polycrystalline ‘thick’ films ( $t \sim 10 \mu\text{m}$ ), indicated via comparison of SEM micrographs of coating C (left panels) and coating D (right panels). Bottom panels show micrographs taken at a higher magnification.

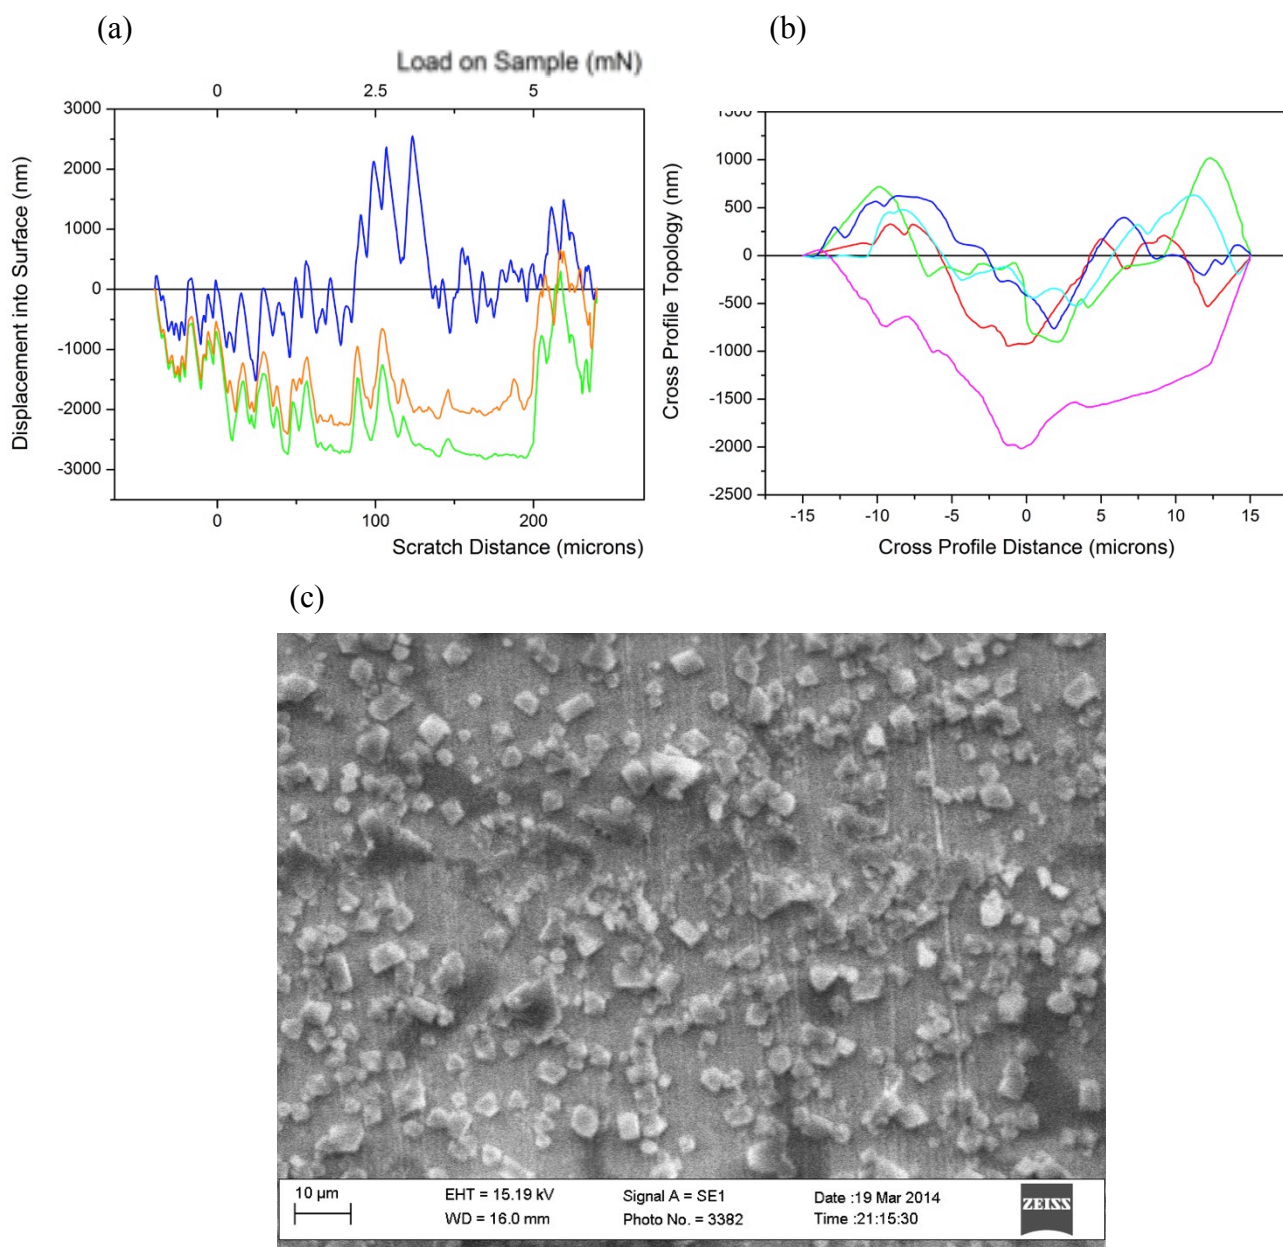

**Figure S5.** (a) 5 mN ramp-load test (tip oriented at  $180^\circ$ ) nanoscratch data for coating A, (b) midway cross profiles (2.5 mN), (c) SEM image of the scratch path after test completion.



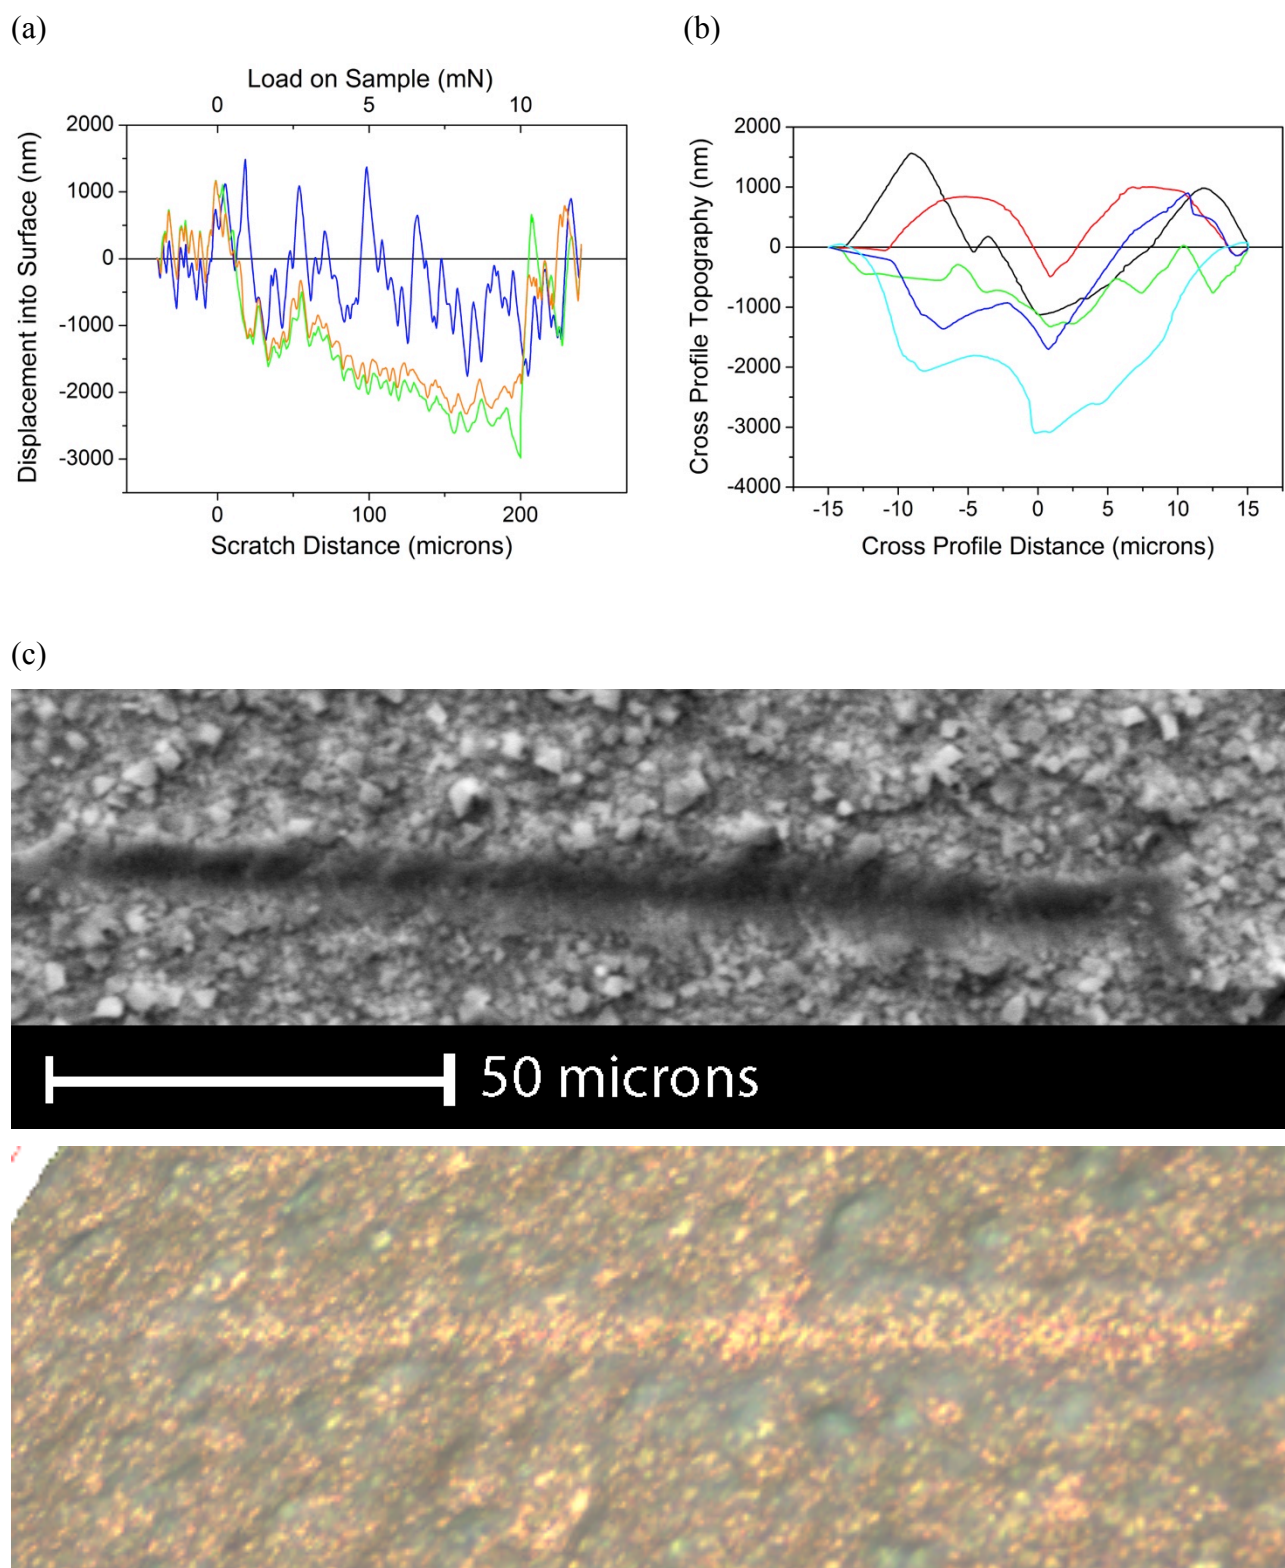

**Figure S6.** (a) 10 mN ramp-load test ( $180^\circ$ ) nanoscratch data for coating B, (b) midway cross profiles, (c) SEM image of the scratch path after test completion and (shown below) the corresponding 3D optical profilometry image.

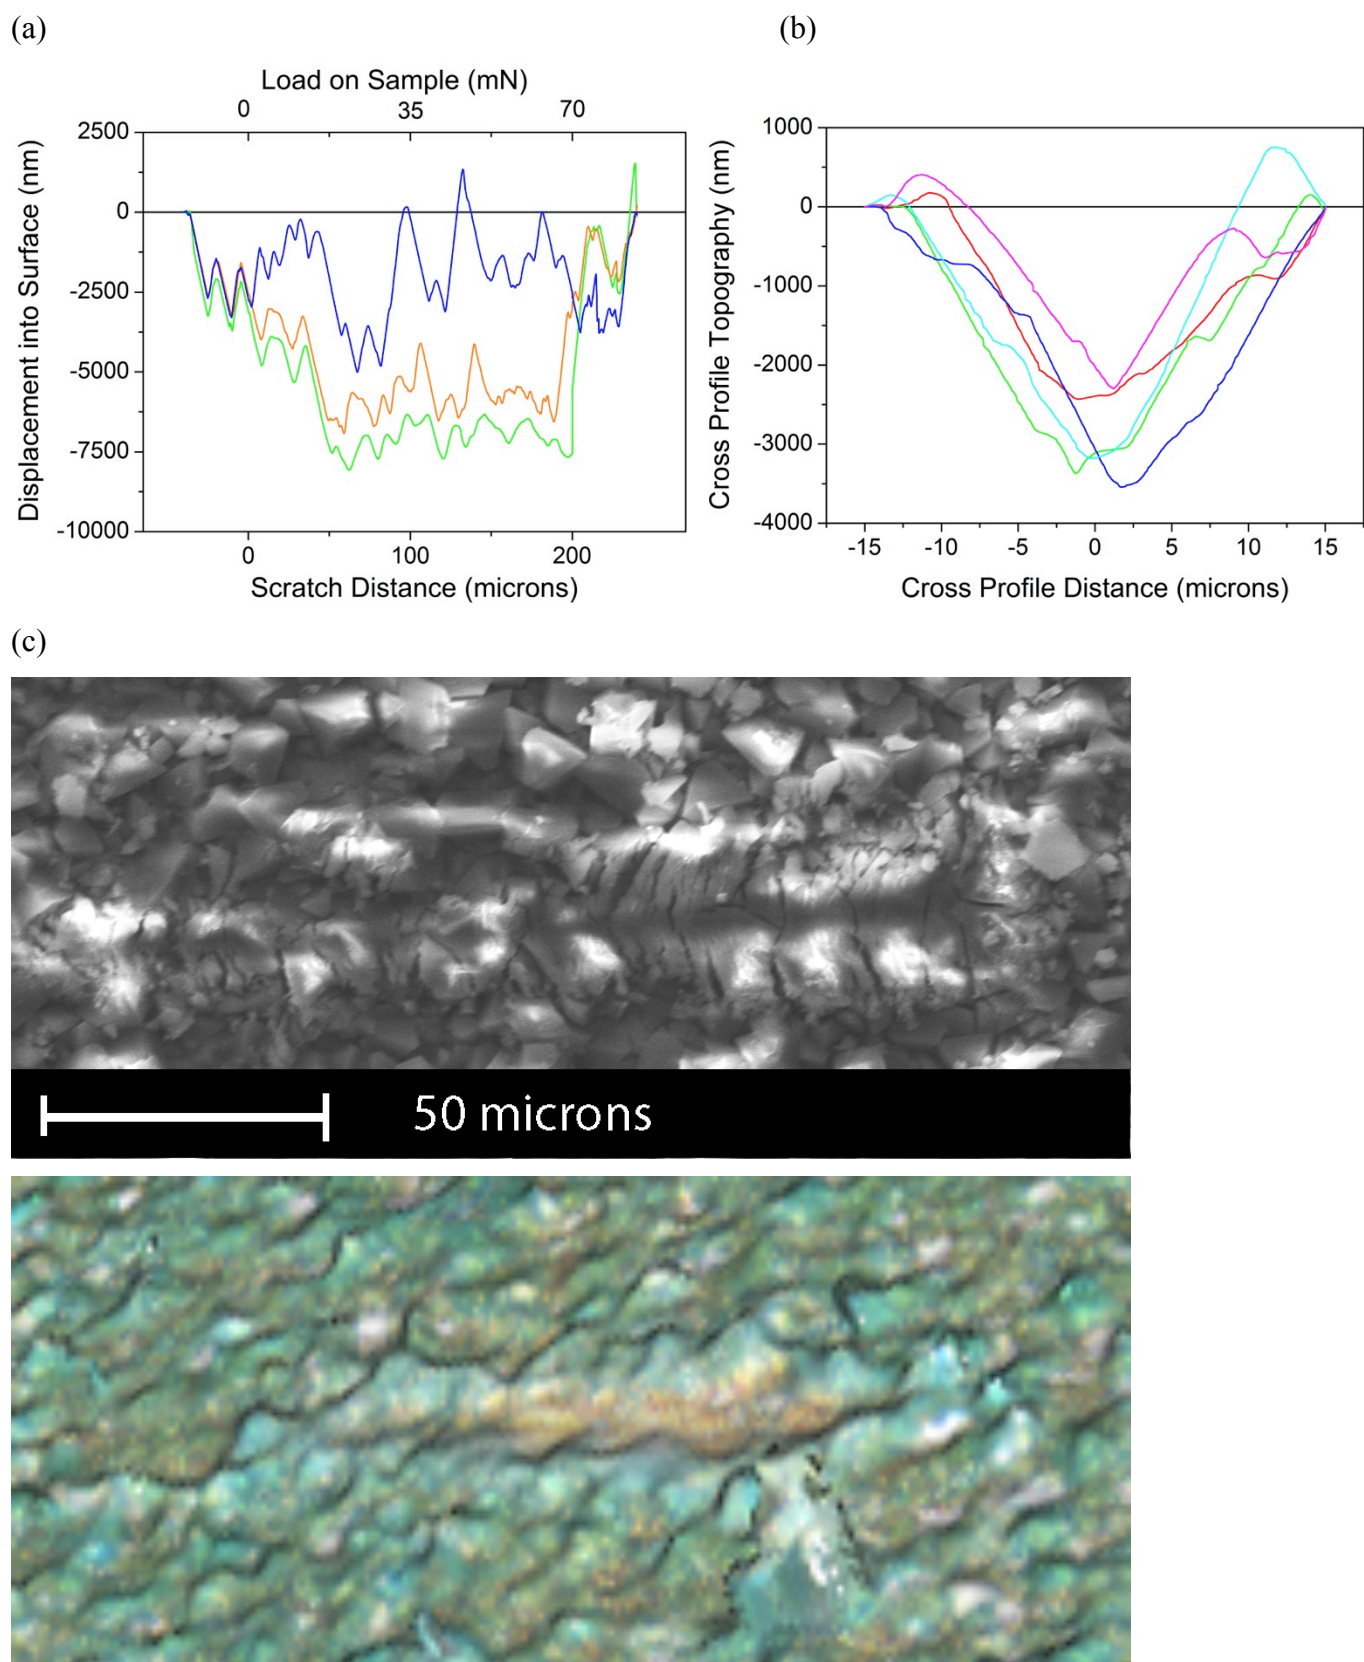

**Figure S7.** (a) 70 mN ramp-load test ( $180^\circ$ ) nanoscratch data for coating C, (b) midway cross profiles, (c) SEM image of the scratch path after test completion and (shown below) the corresponding 3D optical profilometry image.



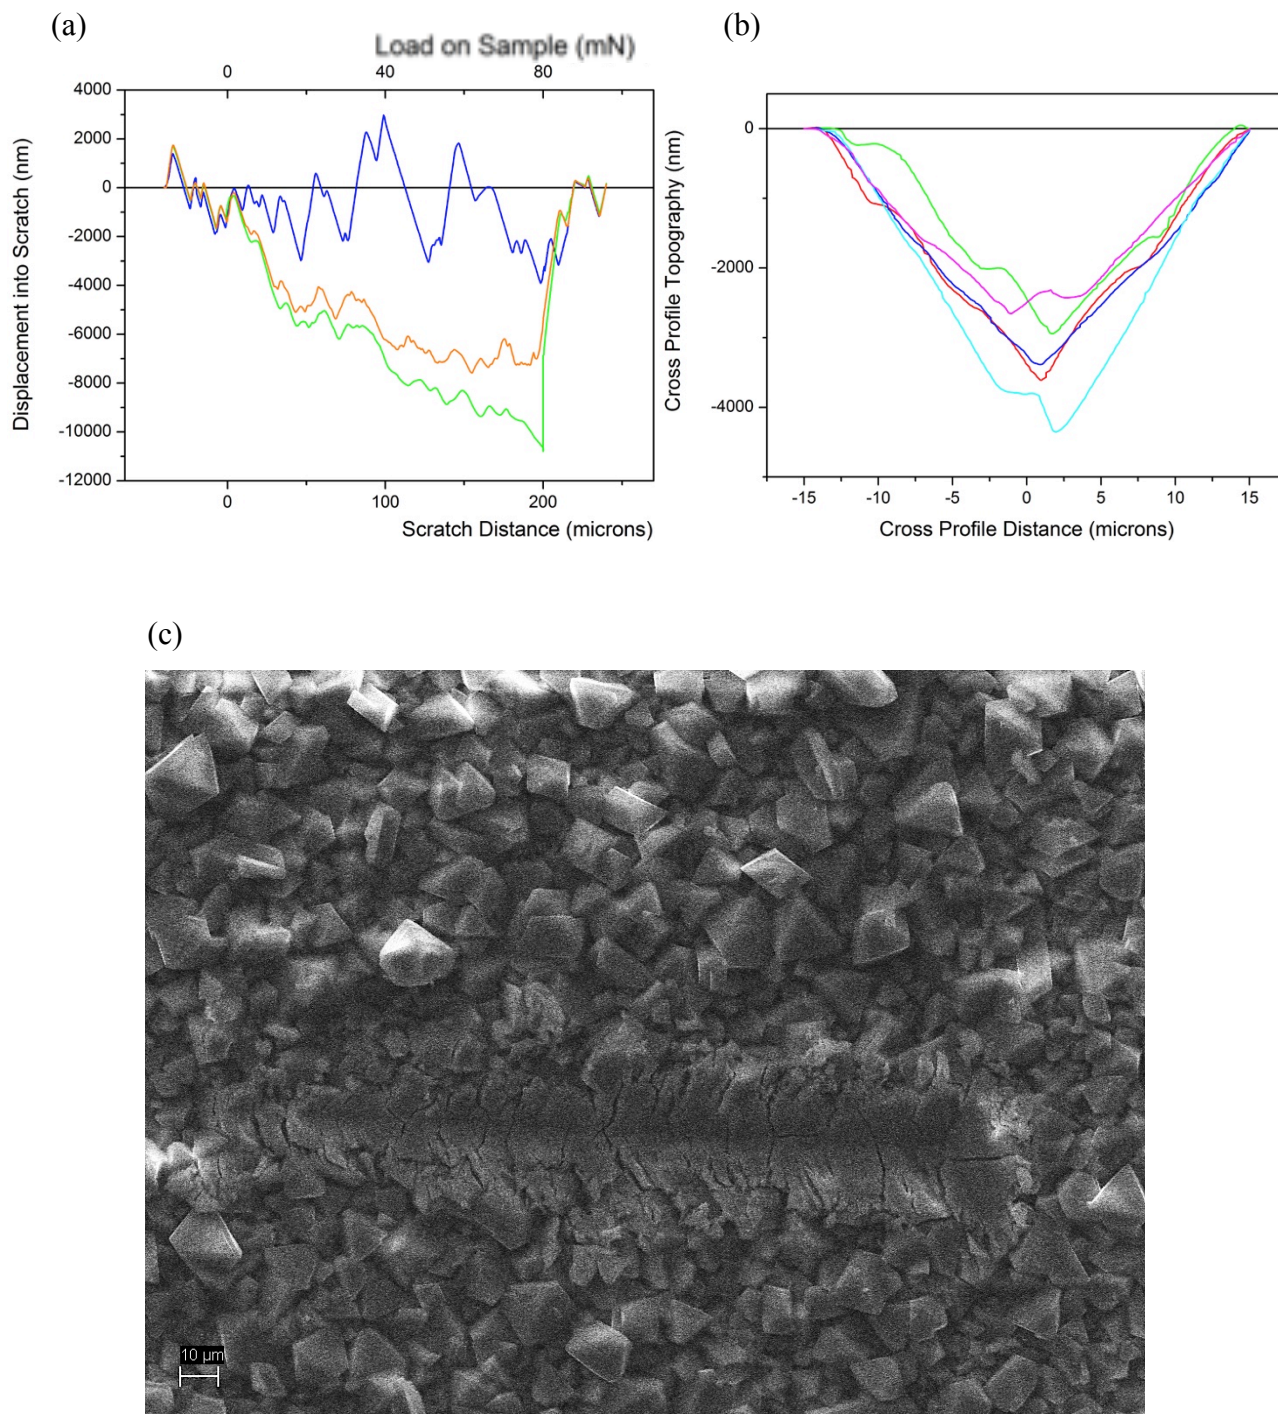

**Figure S8.** (a) 80 mN ramp test nanoscratch data ( $180^\circ$ ) for thin film coating D, (b) midway cross profiles, (c) SEM image of the scratch track.

| Thin Film Coating | Nanoscratch Ramp-Load Test | Film Thickness via Nanoscratch Ramp Tests ( $\mu\text{m}$ ) |      |      |      |      |
|-------------------|----------------------------|-------------------------------------------------------------|------|------|------|------|
| A                 | 5mN 0°                     | 2.5                                                         | 2.0  | 3.0  | 1.5  | 1.5  |
| A                 | 5mN 180°                   | 4.5                                                         | 2.0  | 2.5  | 3.0  | 2.0  |
| A                 | 10mN 0°                    | 3.0                                                         | 1.5  | 1.5  | 2.5  | 2.0  |
| A                 | 10mN 180°                  | 3.5                                                         | 2.5  | 3.5  | 2.5  | 2.5  |
| A                 | 15mN 0°                    | 3.0                                                         | 2.0  | 2.0  | 2.0  | 1.5  |
| A                 | 15mN 180°                  | 2.0                                                         | 3.5  | 2.0  | 2.0  | 4.0  |
| B                 | 50mN 0°                    | 3.5                                                         | X    | 3.5  | X    | 3.0  |
| B                 | 50mN 180°                  | 8.0                                                         | 4.0  | 4.0  | 3.5  | X    |
| B                 | 100mN 0°                   | 4.5                                                         | 6.0  | 4.5  | 7.0  | 6.0  |
| B                 | 100mN 180°                 | 5.0                                                         | 8.0  | 4.5  | 4.5  | 7.0  |
| C                 | 70mN 0°                    | 7.0                                                         | 7.0  | 7.0  | 7.0  | 7.0  |
| C                 | 70mN 180°                  | 8.0                                                         | 4.5  | 7.0  | 9.0  | 6.5  |
| C                 | 80mN 180°                  | 12.0                                                        | 13.5 | X    | 9.5  | 12.0 |
| C                 | 100mN 180°                 | 15.0                                                        | 13.5 | 15.5 | 10.0 | 16.0 |
| C                 | 120mN 180°                 | 20.0                                                        | 15.0 | 15.0 | X    | 15.0 |
| C                 | 150mN 0°                   | 25.0                                                        | 18.0 | 17.0 | 18.0 | X    |
| C                 | 150mN 180°                 | 20.0                                                        | 18.0 | 15.0 | 20.0 | X    |
| D                 | 60mN 180°                  | 8.5                                                         | 8.0  | 9.0  | 7.0  | 7.0  |
| D                 | 80mN 180°                  | 9.0                                                         | 9.0  | 11.0 | 9.0  | 7.0  |
| D                 | 100mN 180°                 | 11.0                                                        | 9.0  | 9.5  | 13.0 | 12.0 |

**Table S3.** Values used for calculating the film thickness via nanoscratch experiments for coatings A, B, C and D.

## References

- (1) Chui, S. S.; Lo, S. M.; Charmant, J. P.; Orpen, A. G.; Williams, I. D., *Science* **1999**, 283, (5405), 1148-50.
